# Supplementary material for: Identification of Interleukin-27 (IL-27)/IL-27 Receptor Subunit Alpha as a Critical Immune Axis for In Vivo HIV Control
Source: PubMed Central journal article supplement (PMC5533920; doi:10.1128/jvi.00441-17), 2017-07-27
Supplement: JVI.00441-17_zjv999182826s1.pdf [file JVI.00441-17_zjv999182826s1.pdf]

**Table S1: The 612 measured proteins in alphabetic order**

| Gene    | Ab                        | Gene   | Ab                     | Gene   | Ab                     |
|---------|---------------------------|--------|------------------------|--------|------------------------|
| A2M     | alpha-macroglobulin mAb   | BMP7   | BMP-7                  | CCL23  | CCL23/CKBeta 8-1 mAb   |
| ACAN    | Proteoglycan 1 mAb        | BMP8B  | BMP8b mAb              | CCL24  | Eotaxin-2 / MPIF-2     |
| ACE     | ACE-2                     | BMPER  | CV-2 / Crossveinless-2 | CCL25  | TECK / CCL25           |
| ACVR1   | Activin RIA / ALK-2       | BMPR1A | BMPR-IA / ALK-3        | CCL26  | Eotaxin-3 / CCL26      |
| ACVR1B  | Activin RIB / ALK-4       | BMPR1B | BMPR-IB / ALK-6        | CCL27  | CTACK / CCL27          |
| ACVR2A  | Activin RIIA              | BMPR2  | BMPR-II                | CCL28  | CCL28 / VIC            |
| ADAM17  | TACE                      | BTC    | BTC                    | CCL3   | MIP-1a                 |
| ADIPOQ  | Adiponectin / Acrp30      | C1QA   | C1q                    | CCL3L1 | LD78beta pAb           |
| AFP     | alpha-fetoprotein mAb     | C1S    | C1s                    | CCL4   | MIP-1b                 |
| AGRP    | AGRP pAb                  | C2     | C2                     | CCL5   | RANTES                 |
| AGT     | Angiotensinogen           | C3     | C3a des Arg            | CCL7   | MCP-3                  |
| ALCAM   | ALCAM                     | C3     | C3c                    | CCL8   | MCP-2                  |
| AMH     | MIS/AMH Propeptide mAb    | C3     | C3d (neoantigen)       | CCR1   | CCR1                   |
| ANG     | Angiogenin                | C3AR1  | C3aR                   | CCR2   | CCR2                   |
| ANGPT1  | Angiopoietin-1            | C4A    | C4 Binding Protein     | CCR3   | CCR3                   |
| ANGPT2  | Angiopoietin-2            | C4A    | C4d (neoantigen)       | CCR4   | CCR4                   |
| ANGPT4  | Angiopoietin-4            | C4A    | C4c                    | CCR5   | CCR5                   |
| ANGPTL1 | ANGPTL1                   | C5     | SC5b-9                 | CCR6   | CCR6                   |
| ANGPTL2 | Angiopoietin-like 2       | C5     | rC5a                   | CCR7   | CCR7                   |
| ANGPTL3 | ANGPTL3                   | C5     | C5                     | CCR8   | CCR8                   |
| ANGPTL4 | ANGPTL4                   | C5     | C5b neo-epitope        | CCR9   | CCR9                   |
| ANGPTL7 | Angiopoietin-like Factor  | C6     | C6                     | CD14   | CD14                   |
| APLNR   | Apelin Receptor           | C7     | C7                     | CD163  | CD 163                 |
| APOB    | ApoB                      | C8A    | C8                     | CD22   | Siglec-2/CD22 mAb      |
| APOE    | ApoE                      | C9     | C9                     | CD27   | CD27 / TNFRSF7         |
| APP     | APP 444-592 mAb (Clone 1) | CARTPT | CART                   | CD36   | CD36                   |
| AREG    | AR (Amphiregulin)         | CCBP2  | D6                     | CD40   | CD40 / TNFRSF5         |
| ARTN    | Artemin                   | CCL1   | I-309                  | CD40LG | TNFSF5 / CD154         |
| AXL     | Axl                       | CCL11  | Eotaxin / CCL11        | CD46   | MCP (CD46)             |
| B2M     | beta 2 microglobulin mAb  | CCL13  | MCP-4 / CCL13          | CD55   | DAF (CD55)             |
| BDNF    | Pro-BDNF mAb              | CCL14  | CCL14 / HCC-1 / HCC-3  | CD59   | CD59 (MEM43 epitope)   |
| BDNF    | BDNF mAb (Clone 1)        | CCL15  | MIP-1d                 | CD80   | B7-1 / CD80            |
| BGLAP   | Osteocalcin               | CCL16  | HCC-4 / CCL16          | CDH5   | VE-Cadherin            |
| BMP10   | BMP-10 propeptide pAb     | CCL17  | Tarc                   | CER1   | Cerberus 1             |
| BMP15   | BMP-15                    | CCL18  | PARC / CCL18           | CFB    | Factor Ba              |
| BMP2    | BMP-2                     | CCL19  | MIP-3 beta             | CFB    | Factor Bb (neoantigen) |
| BMP3    | BMP-3                     | CCL2   | MCP-1                  | CFC1   | Cryptic                |
| BMP4    | BMP-4                     | CCL20  | MIP-3 alpha            | CFD    | Factor D               |
| BMP5    | BMP-5                     | CCL21  | 6Ckine                 | CFH    | Factor H               |
| BMP6    | BMP-6                     | CCL22  | MDC                    | CFI    | iC3b (neoantigen)      |
| CFI     | Factor I                  | CXCR3  | CXCR3                  | FGF16  | FGF-16                 |
| CFP     | Factor P                  | CXCR4  | CXCR4 (fusin)          | FGF17  | FGF-17                 |
| CHRD    | Chordin pAb               | CXCR5  | CXCR5 /BLR-1           | FGF18  | FGF-18                 |
| CHRD1   | Chordin-Like 1            | CXCR6  | CXCR6                  | FGF19  | FGF-19                 |
| CHRD2   | Chordin-Like 2            | CYR61  | CYR61 mAb              | FGF2   | FGF Basic              |
| CLEC11A | SCGF/CLEC11a mAb          | DCN    | Decorin                | FGF20  | FGF-20                 |

|                |                        |                 |                       |                 |                               |
|----------------|------------------------|-----------------|-----------------------|-----------------|-------------------------------|
| <b>CLU</b>     | Clusterin              | <b>DEFB1</b>    | BD-1                  | <b>FGF21</b>    | FGF-21                        |
| <b>CMKLR1</b>  | Chem R23               | <b>DEFB103A</b> | Beta-Defensin 3 pAb   | <b>FGF23</b>    | FGF-23                        |
| <b>CNTF</b>    | CNTF                   | <b>DEFB4A</b>   | beta-Defensin 2       | <b>FGF3</b>     | FGF3 mAb                      |
| <b>CNTFR</b>   | CNTF R alpha           | <b>DKK1</b>     | Dkk-1                 | <b>FGF4</b>     | FGF-4                         |
| <b>COL18A1</b> | Endostatin             | <b>DKK3</b>     | Dkk-3                 | <b>FGF5</b>     | FGF-5                         |
| <b>CR1</b>     | CR1 (CD35)             | <b>DKK4</b>     | Dkk-4                 | <b>FGF6</b>     | FGF-6                         |
| <b>CR2</b>     | CR2 (CD21)             | <b>DKKL1</b>    | Soggy-1               | <b>FGF7</b>     | FGF-7 / KGF                   |
| <b>CRIM1</b>   | CRIM 1                 | <b>DLK1</b>     | Pref-1                | <b>FGF8</b>     | FGF-8                         |
| <b>CRP</b>     | CRP                    | <b>DLL1</b>     | DLL1 pAb              | <b>FGF9</b>     | FGF-9                         |
| <b>CSF1</b>    | M-CSF                  | <b>EDA2R</b>    | EDA-A2                | <b>FGFBP1</b>   | FGF-BP                        |
| <b>CSF1R</b>   | M-CSF R                | <b>EDAR</b>     | EDAR                  | <b>FGFR3</b>    | FGF R3                        |
| <b>CSF2</b>    | GM-CSF                 | <b>EDN1</b>     | Endothelin            | <b>FGFR4</b>    | FGF R4                        |
| <b>CSF2RA</b>  | GM-CSF R alpha         | <b>EGF</b>      | EGF                   | <b>FGFRL1</b>   | FGF R5                        |
| <b>CSF3</b>    | GCSF                   | <b>EGFR</b>     | EGF R / ErbB1         | <b>FGL1</b>     | Hepassocin                    |
| <b>CSF3R</b>   | G-CSF R / CD 114       | <b>ENG</b>      | Endoglin / CD105      | <b>FIGF</b>     | VEGF-D                        |
| <b>CST3</b>    | Cystatin C             | <b>EPO</b>      | Erythropoietin        | <b>FLT3LG</b>   | Flt-3 Ligand                  |
| <b>CTF1</b>    | Cardiotrophin-1 / CT-1 | <b>ERBB2</b>    | ErbB2                 | <b>FLT4</b>     | VEGF R3                       |
| <b>CTGF</b>    | CTGF / CCN2            | <b>ERBB3</b>    | ErbB3                 | <b>FRZB</b>     | sFRP-3                        |
| <b>CTLA4</b>   | CTLA-4 /CD152          | <b>ERBB4</b>    | ErbB4                 | <b>FSHB</b>     | FSH                           |
| <b>CTNNB1</b>  | beta-Catenin           | <b>EREG</b>     | Epiregulin            | <b>FST</b>      | Follistatin                   |
| <b>CX3CL1</b>  | Fractalkine            | <b>ESM1</b>     | Endocan               | <b>FSTL1</b>    | Follistatin-like 1            |
| <b>CXCL1</b>   | GRO                    | <b>F13A1</b>    | Factor XIIIa mAb      | <b>FSTL3</b>    | FLRG                          |
| <b>CXCL10</b>  | IP-10                  | <b>F3</b>       | Coag. Factor III / TF | <b>FTL</b>      | Ferritin mAb (heavy&light)    |
| <b>CXCL11</b>  | I-TAC / CXCL11         | <b>F5</b>       | Factor V pAb          | <b>FURIN</b>    | Furin mAb                     |
| <b>CXCL12</b>  | SDF-1 / CXCL12         | <b>FAM3B</b>    | FAM3B                 | <b>FUT4</b>     | CD15 mAb                      |
| <b>CXCL13</b>  | BLC / BCA-1 / CXCL13   | <b>FAS</b>      | Fas / TNFRSF6         | <b>FZD1</b>     | Frizzled-1                    |
| <b>CXCL14</b>  | CXCL14 / BRAK          | <b>FASLG</b>    | Fas Ligand            | <b>FZD3</b>     | Frizzled-3                    |
| <b>CXCL16</b>  | CXCL16                 | <b>FBLN5</b>    | DANCE                 | <b>FZD4</b>     | Frizzled-4                    |
| <b>CXCL2</b>   | MIP 2                  | <b>FGA</b>      | Fibrinogen alpha      | <b>FZD5</b>     | Frizzled-5                    |
| <b>CXCL5</b>   | ENA-78                 | <b>FGF1</b>     | FGF acidic mAb        | <b>FZD6</b>     | Frizzled-6                    |
| <b>CXCL6</b>   | GCP-2 / CXCL6          | <b>FGF10</b>    | FGF-10 / KGF-2        | <b>FZD7</b>     | Frizzled-7                    |
| <b>CXCL9</b>   | MIG                    | <b>FGF11</b>    | FGF-11                | <b>GALP</b>     | GALP                          |
| <b>CXCR1</b>   | CXCR1 / IL-8 RA        | <b>FGF12</b>    | FGF-12                | <b>GC</b>       | Vitamin D binding protein mAb |
| <b>CXCR2</b>   | CXCR2 / IL-8 RB        | <b>FGF13</b>    | FGF-13 1B             | <b>GCG</b>      | Glucagon                      |
| <b>GDF1</b>    | GDF1                   | <b>IFNG</b>     | IFN-gamma             | <b>IL1B</b>     | IL-1 beta                     |
| <b>GDF10</b>   | BMP-3b / GDF-10        | <b>IFNGR1</b>   | IFN-gamma R1          | <b>IL1F10</b>   | IL-1 F10 / IL-1HY2            |
| <b>GDF11</b>   | GDF11                  | <b>IGF1</b>     | IGF-I                 | <b>IL1F5</b>    | IL-1 F5 / FIL1delta           |
| <b>GDF15</b>   | GDF-15                 | <b>IGF1R</b>    | IGF-I SR              | <b>IL1F6</b>    | IL-1 F6 / FIL1 epsilon        |
| <b>GDF2</b>    | BMP-9 mAb              | <b>IGF2</b>     | IGF-II                | <b>IL1F7</b>    | IL-1 F7 / FIL1 zeta           |
| <b>GDF3</b>    | GDF3                   | <b>IGF2R</b>    | IGF-II R              | <b>IL1F8</b>    | IL-1 F8 / FIL1 eta            |
| <b>GDF5</b>    | GDF5                   | <b>IGFBP1</b>   | IGFBP-1               | <b>IL1F9</b>    | IL-1 F9 / IL-1 H1             |
| <b>GDF6</b>    | BMP-13 pAb             | <b>IGFBP2</b>   | IGFBP-2               | <b>IL1R1</b>    | IL-1 sRI                      |
| <b>GDF9</b>    | GDF9                   | <b>IGFBP3</b>   | IGFBP-3               | <b>IL1R2</b>    | IL-1 sRII                     |
| <b>GDNF</b>    | GDNF                   | <b>IGFBP4</b>   | IGFBP-4               | <b>IL1RAP</b>   | IL-1 R3 / IL-1 R AcP          |
| <b>GFRA1</b>   | GFR alpha-1            | <b>IGFBP6</b>   | IGFBP-6               | <b>IL1RAPL1</b> | IL-1 R8                       |
| <b>GFRA2</b>   | GFR alpha-2            | <b>IGFBP7</b>   | IGFBP-rp1 / IGFBP-7   | <b>IL1RAPL2</b> | IL-1 R9                       |
| <b>GFRA3</b>   | GFR alpha-3            | <b>IL10</b>     | IL-10                 | <b>IL1RL1</b>   | IL-1 R4 /ST2                  |
| <b>GFRA4</b>   | GFR alpha-4            | <b>IL10RA</b>   | IL-10 R alpha         | <b>IL1RL2</b>   | IL-1 R6 / IL-1 Rrp2           |

|               |                             |                |                              |                |                         |
|---------------|-----------------------------|----------------|------------------------------|----------------|-------------------------|
| <b>GH1</b>    | Growth Hormone (GH)         | <b>IL10RB</b>  | IL-10 R beta                 | <b>IL1RN</b>   | IL-1 ra                 |
| <b>GHR</b>    | Growth Hormone R (GHR)      | <b>IL11</b>    | IL-11                        | <b>IL2</b>     | IL-2                    |
| <b>GHRL</b>   | Ghrelin                     | <b>IL12A</b>   | IL-12 p70                    | <b>IL20</b>    | IL-20                   |
| <b>GP1BA</b>  | GPIb alpha mAb              | <b>IL12B</b>   | IL-12 p40                    | <b>IL20RA</b>  | IL-20 R alpha           |
| <b>GPC3</b>   | Glypican 3                  | <b>IL12RB1</b> | IL-12 R beta 1               | <b>IL20RB</b>  | IL-20 R beta            |
| <b>GPC5</b>   | Glypican 5                  | <b>IL12RB2</b> | IL-12 R beta 2               | <b>IL21</b>    | IL-21                   |
| <b>GPNMB</b>  | Osteoactivin / GPNMB        | <b>IL13</b>    | IL-13                        | <b>IL21R</b>   | IL-21 R                 |
| <b>GPR39</b>  | Obestatin R (GPR-39)        | <b>IL13RA1</b> | IL-13 R alpha 1              | <b>IL22</b>    | IL-22                   |
| <b>GPR44</b>  | CRTH-2                      | <b>IL13RA2</b> | IL-13 R alpha 2              | <b>IL22RA1</b> | IL-22 R                 |
| <b>GPX3</b>   | Glutathione peroxidase 3    | <b>IL15</b>    | IL-15                        | <b>IL22RA2</b> | IL-22 BP                |
| <b>GREM1</b>  | GREMLIN                     | <b>IL15RA</b>  | IL-15 R alpha                | <b>IL23A</b>   | IL-23                   |
| <b>GRN</b>    | Progranulin pAb (0.5 mg/ml) | <b>IL16</b>    | IL-16                        | <b>IL23R</b>   | IL-23 R                 |
| <b>GRN</b>    | Progranulin                 | <b>IL17A</b>   | IL-17                        | <b>IL24</b>    | IL-24                   |
| <b>GZMA</b>   | Granzyme A                  | <b>IL17B</b>   | IL-17B                       | <b>IL25</b>    | IL-17E                  |
| <b>HBEGF</b>  | HB-EGF                      | <b>IL17C</b>   | IL-17C                       | <b>IL26</b>    | IL-26                   |
| <b>HGF</b>    | HGF                         | <b>IL17D</b>   | IL-17D                       | <b>IL27</b>    | IL-27                   |
| <b>HP</b>     | Haptoglobin mAb             | <b>IL17F</b>   | IL-17F                       | <b>IL27RA</b>  | TCCR / WSX-1            |
| <b>HPX</b>    | Hemopexin mAb               | <b>IL17RA</b>  | IL-17R                       | <b>IL28A</b>   | IL-28A                  |
| <b>IAPP</b>   | Amylin                      | <b>IL17RB</b>  | IL-17B R                     | <b>IL29</b>    | IL-29                   |
| <b>ICAM1</b>  | ICAM-1                      | <b>IL17RC</b>  | IL-17RC                      | <b>IL2RA</b>   | IL-2 R alpha            |
| <b>ICAM2</b>  | ICAM-2                      | <b>IL17RD</b>  | IL-17RD                      | <b>IL2RB</b>   | IL-2 R beta /CD122      |
| <b>ICAM5</b>  | ICAM-5                      | <b>IL18BP</b>  | IL-18 BPa                    | <b>IL2RG</b>   | IL-2 R gamma            |
| <b>IDE</b>    | Insulysin / IDE             | <b>IL18R1</b>  | IL-18 R alpha /IL-1 R5       | <b>IL3</b>     | IL-3                    |
| <b>IFNAR1</b> | IFN-alpha / beta R1         | <b>IL18RAP</b> | IL-18 R beta /AcPL           | <b>IL31</b>    | IL-31                   |
| <b>IFNAR2</b> | IFN-alpha / beta R2         | <b>IL19</b>    | IL-19                        | <b>IL31RA</b>  | IL-31 RA                |
| <b>IFNB1</b>  | IFN-beta                    | <b>IL1A</b>    | IL-1 alpha                   | <b>IL32</b>    | IL-32 alpha mAb         |
| <b>IL3RA</b>  | IL-3 R alpha                | <b>LIF</b>     | LIF                          | <b>NBL1</b>    | DAN                     |
| <b>IL4</b>    | IL-4                        | <b>LIFR</b>    | LIF R alpha                  | <b>NCAM1</b>   | NCAM-1 / CD56           |
| <b>IL4R</b>   | IL-4 R                      | <b>LOX</b>     | LOX                          | <b>NGF</b>     | beta-NGF                |
| <b>IL5</b>    | IL-5                        | <b>LRP1</b>    | LRP-1                        | <b>NGFR</b>    | NGF R                   |
| <b>IL5RA</b>  | IL-5 R alpha                | <b>LRP6</b>    | LRP-6                        | <b>NLGN2</b>   | Neuroigin 2 pAb         |
| <b>IL6</b>    | IL-6                        | <b>LTA</b>     | TNF-beta                     | <b>NLGN3</b>   | Neuroigin 3 mAb         |
| <b>IL6R</b>   | IL-6 R                      | <b>LTB</b>     | Lymphotoxin beta / TNFSF3    | <b>NLGN4X</b>  | Neuroigin 4 (X/Y) mAb   |
| <b>IL6ST</b>  | sgp130                      | <b>LTBP1</b>   | Latent TGF-beta bp1          | <b>NODAL</b>   | Nodal pAb               |
| <b>IL7</b>    | IL-7                        | <b>LTBR</b>    | Lymphotoxin beta R / TNFRSF3 | <b>NOG</b>     | Noggin mAb              |
| <b>IL7R</b>   | IL-7 R alpha                | <b>MASP1</b>   | MASP1 pAb                    | <b>NOV</b>     | NOV / CCN3              |
| <b>IL8</b>    | IL-8                        | <b>MASP2</b>   | MASP2 pAb                    | <b>NPY</b>     | Neuropeptide Y pAb      |
| <b>IL9</b>    | IL-9                        | <b>MBL2</b>    | MBL                          | <b>NRG1</b>    | NRG1 Isoform GGF2       |
| <b>INHBA</b>  | Inhibin A                   | <b>MDK</b>     | Midkine pAb                  | <b>NRG1</b>    | NRG1-beta1 / HRG1-beta1 |
| <b>INHBA</b>  | Activin A                   | <b>MET</b>     | HGFR                         | <b>NRG1</b>    | HRG-alpha               |
| <b>INHBB</b>  | Inhibin B                   | <b>MFGE8</b>   | MFG-E8                       | <b>NRG2</b>    | NRG2                    |
| <b>INHBB</b>  | Activin B                   | <b>MFRP</b>    | MFRP                         | <b>NRG3</b>    | NRG3                    |
| <b>INHBC</b>  | Activin C                   | <b>MIA</b>     | MIA mAb                      | <b>NRN1</b>    | Neuritin                |
| <b>INS</b>    | Insulin                     | <b>MIF</b>     | MIF                          | <b>NRP2</b>    | Neuropilin-2            |
| <b>INSL3</b>  | INSL3                       | <b>MME</b>     | Neprilysin pAb               | <b>NRTN</b>    | Neurturin               |
| <b>INSR</b>   | Insulin R                   | <b>MMP1</b>    | MMP-1                        | <b>NRXN2</b>   | Neurexin II alpha pAb   |
| <b>INSRR</b>  | INSRR                       | <b>MMP10</b>   | MMP-10                       | <b>NRXN3</b>   | Neurexin III alpha pAb  |
| <b>ITGAL</b>  | LFA-1 alpha                 | <b>MMP11</b>   | MMP-11 /Stromelysin-3        | <b>NTF3</b>    | NT-3                    |

|                  |                          |               |                      |                  |                             |
|------------------|--------------------------|---------------|----------------------|------------------|-----------------------------|
| <b>ITGAM</b>     | MAC-1                    | <b>MMP12</b>  | MMP-12               | <b>NTF4</b>      | NT-4                        |
| <b>ITGB2</b>     | CD18                     | <b>MMP13</b>  | MMP-13               | <b>NTN1</b>      | Netrin1 pAb                 |
| <b>JAG1</b>      | Jagged 1 mAb             | <b>MMP14</b>  | MMP-14               | <b>NTN4</b>      | Netrin 4 mAb                |
| <b>KDR</b>       | VEGF R2 (KDR)            | <b>MMP15</b>  | MMP-15               | <b>OSM</b>       | OSM                         |
| <b>KIT</b>       | SCF R /CD117             | <b>MMP16</b>  | MMP-16 / MT3-MMP     | <b>OSTN</b>      | Osteocrin                   |
| <b>KITLG</b>     | SCF                      | <b>MMP19</b>  | MMP-19               | <b>OTOR</b>      | Otoraplin pAb               |
| <b>KNG1</b>      | Kininostatin / kininogen | <b>MMP2</b>   | MMP-2                | <b>PDGFA</b>     | PDGF-AA                     |
| <b>KREMEN1</b>   | Kremen-1                 | <b>MMP20</b>  | MMP-20               | <b>PDGFA</b>     | PDGF-AB                     |
| <b>KREMEN2</b>   | Kremen-2                 | <b>MMP24</b>  | MMP-24 / MT5-MMP     | <b>PDGFB</b>     | PDGF-BB                     |
| <b>LBP</b>       | LBP                      | <b>MMP25</b>  | MMP-25 / MT6-MMP     | <b>PDGFC</b>     | PDGF-C                      |
| <b>LCN1</b>      | Lipocalin-1              | <b>MMP3</b>   | MMP-3                | <b>PDGFD</b>     | PDGF-D                      |
| <b>LECT2</b>     | LECT2                    | <b>MMP7</b>   | MMP-7                | <b>PDGFRA</b>    | PDGF R alpha                |
| <b>LEFTY2</b>    | Lefty - A                | <b>MMP8</b>   | MMP-8                | <b>PDGFRB</b>    | PDGF R beta                 |
| <b>LEP</b>       | Leptin (OB)              | <b>MMP9</b>   | MMP-9                | <b>PECAM1</b>    | PECAM-1 /CD31               |
| <b>LEPR</b>      | Leptin R                 | <b>MST1</b>   | MSP beta-chain       | <b>PF4</b>       | PF4 / CXCL4                 |
| <b>LGALS1</b>    | Galectin -1              | <b>MST1</b>   | MSP alpha Chain      | <b>PGF</b>       | PIGF                        |
| <b>LGALS3</b>    | Galectin-3               | <b>MSTN</b>   | GDF8                 | <b>PHB</b>       | Prohibitin                  |
| <b>LHB</b>       | Luteinizing Hormone      | <b>MUSK</b>   | Musk                 | <b>PLAU</b>      | uPA                         |
| <b>PLAUR</b>     | uPAR                     | <b>SLC2A2</b> | Glut2                | <b>TNC</b>       | Tenascin C pAb              |
| <b>PLG</b>       | Angiostatin              | <b>SLC2A5</b> | Glut5                | <b>TNF</b>       | TNF-alpha                   |
| <b>PLIN2</b>     | ADFP                     | <b>SLPI</b>   | SLPI                 | <b>TNFAIP6</b>   | TSG-6                       |
| <b>PLUNC</b>     | PLUNC                    | <b>SORL1</b>  | SorL1 pAb            | <b>TNFRSF10A</b> | TRAILR1 / DR4 / TNFRSF10A   |
| <b>POMC</b>      | ACTH                     | <b>SOST</b>   | SOST mAb             | <b>TNFRSF10B</b> | TRAILR2 / DR5 / TNFRSF10B   |
| <b>PPBP</b>      | NAP2 pAb                 | <b>SPARC</b>  | Osteonectin          | <b>TNFRSF10C</b> | TRAILR3 / TNFRSF10C         |
| <b>PRL</b>       | Prolactin                | <b>SPN</b>    | ACE / CD43           | <b>TNFRSF10D</b> | TRAILR4 / TNFRSF10D         |
| <b>PRNP</b>      | Prion protein Prp pAb    | <b>SPP1</b>   | Osteopontin mAb      | <b>TNFRSF11A</b> | RANK / TNFRSF11A            |
| <b>PROK1</b>     | EG-VEGF / PK1            | <b>SST</b>    | Somatostatin pAb     | <b>TNFRSF11B</b> | Osteoprotegerin / TNFRSF11B |
| <b>PSPN</b>      | Persephin                | <b>TDGF1</b>  | Cripto-1             | <b>TNFRSF13B</b> | TACI / TNFRSF13B            |
| <b>PTHLH</b>     | PTHLH pAb                | <b>TEK</b>    | Tie-2                | <b>TNFRSF13C</b> | BAFF R / TNFRSF13C          |
| <b>PTN</b>       | Pleiotrophin pAb         | <b>TF</b>     | Transferrin mAb      | <b>TNFRSF14</b>  | HVEM / TNFRSF14             |
| <b>PTX3</b>      | Pentraxin3 / TSG-14      | <b>TFF2</b>   | TFF2 mAb             | <b>TNFRSF17</b>  | BCMA / TNFRSF17             |
| <b>PYY</b>       | PYY                      | <b>TFF3</b>   | TFF3 mAb             | <b>TNFRSF18</b>  | GITR / TNFRF18              |
| <b>RBP4</b>      | RBP4                     | <b>TFPI</b>   | TFPI                 | <b>TNFRSF19</b>  | TROY / TNFRSF19             |
| <b>RELN</b>      | Reelin (G-20) pAb        | <b>TGFA</b>   | TGF-alpha            | <b>TNFRSF1A</b>  | TNF RI / TNFRSF1A           |
| <b>RELT</b>      | RELT / TNFRSF19L         | <b>TGFB1</b>  | LAP (TGF-B1)         | <b>TNFRSF1B</b>  | TNF RII / TNFRSF1B          |
| <b>RETN</b>      | Resistin                 | <b>TGFB1</b>  | TGF-B1 mAb           | <b>TNFRSF21</b>  | DR6 / TNFRSF21              |
| <b>RETNLB</b>    | RELM beta                | <b>TGFB2</b>  | TGF-beta 2           | <b>TNFRSF25</b>  | TWEAK R / TNFRSF12          |
| <b>ROBO4</b>     | ROBO4                    | <b>TGFB3</b>  | TGF-beta 3           | <b>TNFRSF6B</b>  | DcR3 / TNFRSF6B             |
| <b>S1PR1</b>     | EDG-1                    | <b>TGFBR1</b> | TGF-beta RI / ALK-5  | <b>TNFRSF8</b>   | CD30 / TNFRSF8              |
| <b>SAA1</b>      | SAA                      | <b>TGFBR2</b> | TGF-beta RII         | <b>TNFRSF9</b>   | CD137 / 4-1BB               |
| <b>SDC3</b>      | Syndecan-3               | <b>TGFBR3</b> | TGF-beta RIII        | <b>TNFSF10</b>   | TRAIL / TNFSF10             |
| <b>SELE</b>      | E-Selectin               | <b>THBS1</b>  | Thrombospondin (TSP) | <b>TNFSF11</b>   | TRANCE                      |
| <b>SELL</b>      | L-Selectin (CD62L)       | <b>THBS2</b>  | Thrombospondin-2     | <b>TNFSF12</b>   | TWEAK / TNFSF12             |
| <b>SELP</b>      | P-selectin               | <b>THBS4</b>  | Thrombospondin-4     | <b>TNFSF13</b>   | APRIL                       |
| <b>SEMA3A</b>    | SEMA3A                   | <b>THPO</b>   | Thrombopoietin (TPO) | <b>TNFSF13B</b>  | BAFF/BLYS/TNFSF13B mAb      |
| <b>SERPINA1</b>  | alpha 1 antitrypsin pAb  | <b>TIE1</b>   | Tie-1                | <b>TNFSF14</b>   | LIGHT / TNFSF14             |
| <b>SERPINA12</b> | Vaspin                   | <b>TIMP1</b>  | TIMP-1               | <b>TNFSF15</b>   | VEGI / TNFSF15              |
| <b>SERPINF1</b>  | PEDF                     | <b>TIMP2</b>  | TIMP-2               | <b>TNFSF18</b>   | GITR Ligand / TNFSF18       |

|                 |                                 |                |                        |               |                         |
|-----------------|---------------------------------|----------------|------------------------|---------------|-------------------------|
| <b>SERPING1</b> | C1Inhib                         | <b>TIMP3</b>   | TIMP-3                 | <b>TNFSF4</b> | OX40 Ligand / TNFSF4    |
| <b>SFRP1</b>    | sFRP-1                          | <b>TIMP4</b>   | TIMP-4                 | <b>TNFSF8</b> | CD30 Ligand / TNFSF8    |
| <b>SFRP4</b>    | sFRP-4                          | <b>TLR1</b>    | TLR1                   | <b>TNFSF9</b> | 4-1BB ligand/TNFSF9 mAb |
| <b>SHBG</b>     | SHBG mAb                        | <b>TLR2</b>    | TLR2                   | <b>TREM1</b>  | TREM-1                  |
| <b>SHH</b>      | Sonic Hedgehog (Shh N-terminal) | <b>TLR3</b>    | TLR3                   | <b>TSHB</b>   | TSH                     |
| <b>SIGIRR</b>   | SIGIRR                          | <b>TLR4</b>    | TLR4                   | <b>TSLP</b>   | TSLP                    |
| <b>SIGLEC5</b>  | Siglec-5/CD170                  | <b>TMEFF1</b>  | TMEFF1 / Tomoregulin-1 | <b>TYMP</b>   | PD-ECGF                 |
| <b>SIGLEC9</b>  | Siglec-9                        | <b>TMEFF2</b>  | TMEFF2                 | <b>TYRO3</b>  | Dtk                     |
| <b>SLC2A1</b>   | Glut1                           | <b>TMPO</b>    | Thymopoietin           | <b>VASN</b>   | Vasorin                 |
| <b>SLC2A14</b>  | Glut3                           | <b>TMPRSS5</b> | Spinesin               | <b>VCAM1</b>  | VCAM-1 (CD106)          |
| <b>VEGFA</b>    | VEGF                            |                |                        |               |                         |
| <b>VEGFB</b>    | VEGF-B                          |                |                        |               |                         |
| <b>VEGFC</b>    | VEGF-C                          |                |                        |               |                         |
| <b>VTN</b>      | S Protein (Vitronectin)         |                |                        |               |                         |
| <b>VWF</b>      | von Willebrand Factor A2 mAb    |                |                        |               |                         |
| <b>WFIKKN1</b>  | GASP-2 / WFIKKN                 |                |                        |               |                         |
| <b>WIF1</b>     | WIF-1                           |                |                        |               |                         |
| <b>WISP1</b>    | WISP-1 / CCN4                   |                |                        |               |                         |
| <b>WISP2</b>    | WISP2 pAb                       |                |                        |               |                         |
| <b>WISP3</b>    | WISP3 pAb                       |                |                        |               |                         |
| <b>WNT3A</b>    | Wnt3a pAb                       |                |                        |               |                         |
| <b>XCL1</b>     | Lymphotactin / XCL1             |                |                        |               |                         |

The 612 signaling proteins in alphabetic order based on their HUGO gene names and their commercial antibody names. Some proteins/genes have multiple antibodies, if antibodies exist against distinct protein modifications or precursors with potentially different biological functions (e.g. C3 or TGFB1).

**Table S2: HIV infected patients used for Communicome analysis**

| Group       | Age (years) | Gender (M/F) | Viral Load (plasma RNA copies/ml) | CD4 count (cells/mm <sup>3</sup> ) | CTL Breadth | CTL Magnitude | Proviral | Communicome | RT-PCR   |
|-------------|-------------|--------------|-----------------------------------|------------------------------------|-------------|---------------|----------|-------------|----------|
| HIV-Low 01  | 34          | M            | 950                               | 608                                | 17          | 14,330        | 163.6    | Analyzed    | Analyzed |
| HIV-Low 02  | 56          | F            | <50                               | 873                                | 12          | 22,850        | 16       | Analyzed    | Analyzed |
| HIV-Low 03  | 41          | M            | <50                               | 616                                | 78          | 46,330        | ND       | Analyzed    | ND       |
| HIV-Low 04  | 35          | M            | 9,999                             | 438                                | 27          | 24,300        | 317.7    | Analyzed    | Analyzed |
| HIV-Low 05  | 46          | M            | 1,100                             | 485                                | 52          | 66,380        | 76.7     | Analyzed    | Analyzed |
| HIV-Low 06  | 46          | F            | <50                               | 1,083                              | 15          | 13,280        | 6.7      | Analyzed    | Analyzed |
| HIV-Low 07  | 40          | M            | 210                               | 786                                | 11          | 3,820         | ND       | Analyzed    | ND       |
| HIV-Low 08  | 48          | F            | 8,900                             | 913                                | 49          | 36,910        | 412.5    | Analyzed    | Analyzed |
| HIV-Low 09  | 28          | M            | 1,000                             | 889                                | 24          | 11,700        | ND       | Analyzed    | ND       |
| HIV-Low 10  | 37          | M            | 810                               | 665                                | 15          | 30,085        | ND       | Analyzed    | ND       |
| HIV-Low 11  | 37          | F            | 1,800                             | 511                                | 50          | 32,241        | 180.8    | Analyzed    | Analyzed |
| HIV-Low 12  | 50          | F            | <50                               | 487                                | 69          | 45,658        | 9.1      | Analyzed    | Analyzed |
| HIV-Low 13  | 40          | F            | 340                               | 832                                | 44          | 45,007        | 294.3    | Analyzed    | Analyzed |
| HIV-Low 14  | 37          | F            | <50                               | 665                                | 10          | 8,500         | 25.7     | Analyzed    | Analyzed |
| HIV-Low 15  | 38          | M            | 160                               | 512                                | 29          | 48,160        | ND       | Analyzed    | ND       |
| HIV-Low 16  | 33          | M            | 530                               | 948                                | 24          | 26,890        | 25.8     | Analyzed    | Analyzed |
| HIV-Low 17  | 34          | M            | 4,300                             | 587                                | 14          | 4,640         | ND       | Analyzed    | ND       |
| HIV-Low 18  | 29          | M            | <50                               | 892                                | 9           | 3,220         | 0        | Analyzed    | Analyzed |
| HIV-Low 19  | 27          | M            | 7,700                             | 733                                | 47          | 24,198        | ND       | Analyzed    | ND       |
| HIV-Low 20  | 45          | F            | 2,900                             | 582                                | 63          | 42,517        | 278.5    | Analyzed    | Analyzed |
| HIV-Low 21  | 30          | F            | <50                               | 1,114                              | 17          | 8,200         | ND       | Analyzed    | ND       |
| HIV-Low 22  | 46          | F            | 2,800                             | 434                                | ND          | ND            | 32.5     | Analyzed    | Analyzed |
| HIV-Low 23  | 38          | M            | <50                               | 583                                | 30          | 13,041        | 90.4     | Analyzed    | Analyzed |
| HIV-Low 24  | 26          | M            | 2,300                             | 642                                | 27          | 44,150        | 49.1     | Analyzed    | Analyzed |
| HIV-Low 25  | 42          | M            | 5,600                             | 531                                | 40          | 27,660        | ND       | Analyzed    | ND       |
| HIV-Low 26  | 44          | M            | 50                                | 872                                | 35          | 16,229        | 6.2      | Analyzed    | Analyzed |
| HIV-Low 27  | 48          | M            | 50                                | 657                                | ND          | ND            | ND       | Analyzed    | ND       |
| HIV-Low 28  | 41          | F            | <50                               | 672                                | 7           | 1,530         | 20.9     | Analyzed    | Analyzed |
| HIV-Low 29  | 50          | F            | 50                                | 1,228                              | 22          | 25,600        | 0        | Analyzed    | Analyzed |
| HIV-Low 30  | 46          | M            | 66                                | 755                                | ND          | ND            | 28.6     | Analyzed    | Analyzed |
| HIV-Low 31  | 51          | M            | <50                               | 450                                | ND          | ND            | 41.5     | Analyzed    | Analyzed |
| HIV-Low 32  | 48          | F            | 230                               | 516                                | 39          | 15,810        | 15.9     | Analyzed    | Analyzed |
| HIV-Low 33  | 43          | M            | 330                               | 1,237                              | 15          | 5,490         | 31.3     | Analyzed    | Analyzed |
| HIV-Low 34  | 40          | F            | 1,500                             | 1,084                              | ND          | ND            | ND       | Analyzed    | ND       |
| HIV-Low 35  | 48          | M            | 50                                | 601                                | ND          | ND            | 18.4     | Analyzed    | Analyzed |
| HIV-Low 36  | 35          | F            | <50                               | 930                                | 5           | 660           | 11.5     | Analyzed    | Analyzed |
| HIV-Low 37  | 36          | F            | 880                               | 1,343                              | 9           | 2,630         | 12.1     | Analyzed    | Analyzed |
| HIV-Low 38  | 40          | F            | 4,800                             | 569                                | 16          | 6,580         | 153.5    | Analyzed    | ND       |
| HIV-Low 39  | 57          | F            | 50                                | 485                                | 10          | 5,390         | ND       | Analyzed    | ND       |
| HIV-Low 40  | 45,8        | M            | 1,700                             | 742                                | ND          | ND            | ND       | Analyzed    | ND       |
| HIV-Low 41  | 48          | M            | <50                               | 593                                | ND          | ND            | ND       | Analyzed    | ND       |
| HIV-Low 42  | 31          | M            | 9,756                             | 404                                | 10          | 1,850         | 620.7    | Analyzed    | ND       |
| HIV-Low 43  | 29          | M            | 5,624                             | 823                                | 29          | 8,170         | 1,662.4  | Analyzed    | Analyzed |
| HIV-Low 45  | 41          | M            | 6,127                             | 531                                | 14          | 2,300         | 50.2     | Analyzed    | Analyzed |
| HIV-Low 46  | 34          | M            | 400                               | 1,035                              | 4           | 730           | 220.1    | Analyzed    | Analyzed |
| HIV-Low 47  | 33          | F            | 7,923                             | 524                                | 2           | 480           | 366.5    | Analyzed    | Analyzed |
| HIV-Low 48  | 30          | F            | 8,858                             | 289                                | 4           | 1,780         | ND       | Analyzed    | ND       |
| HIV-Low 49  | 39          | F            | 4,424                             | 419                                | 16          | 4,290         | ND       | Analyzed    | ND       |
| HIV-Low 50  | 30          | M            | 4,482                             | 1,151                              | 10          | 2,610         | 0        | Analyzed    | Analyzed |
| HIV-High 01 | 21          | F            | 269,431                           | 212                                | 8           | 1,150         | 4.2      | Analyzed    | ND       |
| HIV-High 02 | 28          | F            | 74,922                            | 571                                | 4           | 280           | ND       | Analyzed    | ND       |
| HIV-High 03 | 27          | F            | 108,103                           | 369                                | 13          | 6,240         | ND       | Analyzed    | ND       |
| HIV-High 06 | 37          | F            | 140,000                           | 11                                 | 15          | 19,650        | 231.9    | Analyzed    | Analyzed |
| HIV-High 07 | 40          | F            | 64,000                            | 282                                | 12          | 4,415         | 922.6    | Analyzed    | Analyzed |
| HIV-High 08 | 45          | F            | 86,000                            | 90                                 | 50          | 49,480        | ND       | Analyzed    | ND       |
| HIV-High 09 | 24          | F            | 610,000                           | 128                                | 15          | 4,428         | 1,722.4  | Analyzed    | Analyzed |
| HIV-High 10 | 47          | F            | 510,000                           | 33                                 | 18          | 8,400         | ND       | Analyzed    | ND       |
| HIV-High 11 | 33          | F            | 1,200,000                         | 75                                 | 15          | 20,050        | 80.1     | Analyzed    | Analyzed |
| HIV-High 12 | 50          | F            | 54,000                            | 67                                 | 7           | 2,040         | 363.6    | Analyzed    | Analyzed |
| HIV-High 13 | 42          | F            | 1,100,000                         | 283                                | 21          | 41,420        | ND       | Analyzed    | ND       |
| HIV-High 14 | 45          | F            | 68,000                            | 98                                 | 12          | 9,420         | ND       | Analyzed    | ND       |
| HIV-High 15 | 44          | F            | 510,000                           | 12                                 | 10          | 2,100         | ND       | Analyzed    | ND       |
| HIV-High 16 | 21          | M            | 80,328                            | 437                                | 23          | 19,940        | ND       | Analyzed    | ND       |
| HIV-High 17 | 22          | M            | 152,554                           | 293                                | 8           | 1,340         | 3,143.4  | Analyzed    | ND       |
| HIV-High 18 | 22          | M            | 53,299                            | 356                                | 14          | 3,450         | ND       | Analyzed    | ND       |
| HIV-High 19 | 23          | M            | 70,393                            | 208                                | 10          | 11,530        | 223.7    | Analyzed    | ND       |
| HIV-High 20 | 23          | M            | 55,733                            | 340                                | 4           | 1,320         | ND       | Analyzed    | ND       |
| HIV-High 21 | 23          | M            | 50,295                            | 505                                | 7           | 3,910         | 1,176.5  | Analyzed    | Analyzed |
| HIV-High 22 | 23          | M            | 240,039                           | 388                                | ND          | ND            | 1,144.6  | Analyzed    | Analyzed |
| HIV-High 23 | 24          | M            | 93,928                            | 256                                | 1           | 50            | 3,246.6  | Analyzed    | Analyzed |
| HIV-High 24 | 24          | M            | 365,977                           | 726                                | 35          | 18,535        | 1,204.6  | Analyzed    | Analyzed |
| HIV-High 25 | 24          | M            | 150,176                           | 407                                | 10          | 2,434         | ND       | Analyzed    | ND       |
| HIV-High 26 | 25          | M            | 60,467                            | 634                                | 16          | 8,080         | ND       | Analyzed    | ND       |
| HIV-High 27 | 26          | M            | 750,000                           | 239                                | 28          | 9,900         | 941.4    | Analyzed    | ND       |

|             |    |   |          |     |    |         |         |          |          |
|-------------|----|---|----------|-----|----|---------|---------|----------|----------|
| HIV-High 28 | 27 | M | 54,304   | 704 | 20 | 102.00  | ND      | Analyzed | ND       |
| HIV-High 29 | 28 | M | 216,105  | 313 | 15 | 3,480   | 3,021.1 | Analyzed | ND       |
| HIV-High 30 | 28 | M | 327,087  | 544 | 10 | 5,790   | 2,127.2 | Analyzed | Analyzed |
| HIV-High 31 | 29 | M | 418,022  | 253 | 15 | 4,790   | ND      | Analyzed | ND       |
| HIV-High 32 | 29 | M | 125,701  | 404 | 9  | 6,320   | ND      | Analyzed | ND       |
| HIV-High 33 | 30 | M | >750,000 | 244 | 7  | 1,980   | ND      | Analyzed | ND       |
| HIV-High 34 | 30 | M | 61,078   | 380 | 22 | 27,750  | 558.4   | Analyzed | Analyzed |
| HIV-High 35 | 31 | M | 194,091  | 271 | 7  | 590     | 1,962.5 | Analyzed | Analyzed |
| HIV-High 36 | 31 | M | 85,102   | 365 | 11 | 5,350   | ND      | Analyzed | ND       |
| HIV-High 38 | 32 | M | 57,021   | 480 | 14 | 16,140  | ND      | Analyzed | ND       |
| HIV-High 39 | 32 | M | 170,000  | 17  | 83 | 145,250 | 507     | Analyzed | Analyzed |
| HIV-High 40 | 33 | M | 320,000  | 192 | 51 | 21,200  | ND      | Analyzed | ND       |
| HIV-High 41 | 33 | M | 97,483   | 451 | 21 | 36,010  | ND      | Analyzed | ND       |
| HIV-High 42 | 35 | M | 71,739   | 227 | 5  | 690     | 1,562.5 | Analyzed | ND       |
| HIV-High 43 | 35 | M | 95,365   | 240 | 5  | 660     | 3,149.2 | Analyzed | Analyzed |
| HIV-High 44 | 35 | M | 102,936  | 283 | 35 | 12,790  | 1,346.3 | Analyzed | Analyzed |
| HIV-High 45 | 35 | M | 63,381   | 384 | 44 | 46,800  | 1,128.7 | Analyzed | Analyzed |
| HIV-High 46 | 36 | M | 126,557  | 364 | 23 | 32,690  | ND      | Analyzed | ND       |
| HIV-High 47 | 37 | M | 61,000   | 80  | 0  | 0       | ND      | Analyzed | ND       |
| HIV-High 48 | 37 | M | 61,011   | 641 | 3  | 930     | ND      | Analyzed | ND       |
| HIV-High 49 | 37 | M | 140,000  | 20  | 35 | 7,060   | ND      | Analyzed | ND       |
| HIV-High 50 | 38 | M | 544,275  | 402 | 33 | 22,080  | ND      | Analyzed | ND       |

ND: Not determined

CTL\_B: Number of reactive peptides

CTL\_M: Median of SFC per 10<sup>6</sup> PBMC

M: Male

F: Female

**Table S3: Independent cohorts used for ELISA and RT-PCR validation**

|                              | Group                                    | Age (years) | Gender (M/F) | Viral Load (RNA copies/ml) | CD4 count (cells/mm3) | Proviral | Time pre HIV infection and pre or post (cART treatment) (days) | ELISA    | RT-PCR   |
|------------------------------|------------------------------------------|-------------|--------------|----------------------------|-----------------------|----------|----------------------------------------------------------------|----------|----------|
| <b>Seronegatives</b>         | Seroneg_01                               | 35          | M            | NA                         | NA                    | ND       | -120                                                           | Analyzed | ND       |
|                              | Seroneg_02                               | 30          | M            | NA                         | NA                    | 1245.8   | -60                                                            | Analyzed | Analyzed |
|                              | Seroneg_03                               | 21          | M            | NA                         | NA                    | 4.8      | -60                                                            | Analyzed | Analyzed |
|                              | Seroneg_04                               | 24          | M            | NA                         | NA                    | ND       | -60                                                            | Analyzed | ND       |
|                              | Seroneg_05                               | 34          | M            | NA                         | NA                    | 384.2    | -90                                                            | Analyzed | Analyzed |
|                              | Seroneg_06                               | 33          | M            | NA                         | NA                    | 5.9      | -60                                                            | Analyzed | Analyzed |
|                              | Seroneg_07                               | 32          | M            | NA                         | NA                    | 16.9     | -60                                                            | Analyzed | Analyzed |
|                              | Seroneg_08                               | 27          | M            | NA                         | NA                    | 0        | -60                                                            | Analyzed | Analyzed |
| <b>Chronics HIV infected</b> | Chr-Untreat-5                            | 46          | M            | 4,900                      | 462                   | 175.5    | -12                                                            | Analyzed | Analyzed |
|                              | Chr-Untreat-6                            | 40          | M            | 15,000                     | 504                   | 281.6    | -11                                                            | Analyzed | Analyzed |
|                              | Chr-Untreat-11                           | 28          | F            | 15,000                     | 456                   | 549.8    | -146                                                           | Analyzed | Analyzed |
|                              | Chr-Untreat-12                           | 44          | M            | 50,000                     | 629                   | 222.2    | -90                                                            | Analyzed | Analyzed |
|                              | Chr-Untreat-14                           | 29          | M            | 13,284                     | 661                   | 8.5      | -49                                                            | Analyzed | ND       |
|                              | Chr-Untreat-15                           | 37          | M            | 8,110                      | 432                   | 317.5    | -36                                                            | Analyzed | Analyzed |
|                              | Chr-treat-5                              | 47          | M            | <50                        | 532                   | 52.3     | 329                                                            | Analyzed | Analyzed |
|                              | Chr-treat-9                              | 33          | M            | <25                        | 460                   | 387.5    | 367                                                            | Analyzed | Analyzed |
|                              | Chr-treat-11                             | 30          | F            | <25                        | 786                   | 191.4    | 480                                                            | Analyzed | Analyzed |
|                              | Chr-treat-12                             | 45          | M            | <50                        | 558                   | 43       | 367                                                            | Analyzed | Analyzed |
|                              | Chr-treat-13                             | 36          | F            | <40                        | 720                   | 115.9    | 347                                                            | Analyzed | Analyzed |
|                              | Chr-treat-15                             | 38          | M            | <40                        | 659                   | 89.3     | 474                                                            | Analyzed | Analyzed |
|                              | <b>Chronics HIV infected Controllers</b> | VC_01       | 45           | F                          | 790                   | 588      | 466.6                                                          | N.A      | Analyzed |
| VC_02                        |                                          | 40          | M            | 55                         | 1,014                 | 27.1     | N.A                                                            | Analyzed | Analyzed |
| VC_03                        |                                          | 48          | M            | 1,978                      | 1,840                 | 9.4      | N.A                                                            | Analyzed | Analyzed |
| VC_04                        |                                          | 36          | F            | 374                        | 594                   | 74.9     | N.A                                                            | Analyzed | Analyzed |
| VC_05                        |                                          | 38          | M            | 972                        | 405                   | 38.2     | N.A                                                            | Analyzed | Analyzed |
| VC_06                        |                                          | 44          | F            | 1,300                      | 510                   | 64.4     | N.A                                                            | Analyzed | Analyzed |
| VC_07                        |                                          | 47          | M            | 1,200                      | 680                   | 35.4     | N.A                                                            | Analyzed | Analyzed |
| VC_08                        |                                          | 47          | M            | 1,500                      | 538                   | 324.9    | N.A                                                            | Analyzed | Analyzed |
| VC_09                        |                                          | 41          | M            | 200                        | 603                   | 56.5     | N.A                                                            | Analyzed | Analyzed |
| VC_10                        |                                          | 54          | M            | 480                        | 540                   | 75.7     | N.A                                                            | Analyzed | Analyzed |
| VC_11                        |                                          | 52          | F            | 1,600                      | 448                   | 201.8    | N.A                                                            | Analyzed | Analyzed |
| EC_01                        |                                          | 31          | F            | <25                        | 922                   | 0        | N.A                                                            | Analyzed | Analyzed |
| EC_03                        |                                          | 40          | F            | <40                        | 752                   | 8.5      | N.A                                                            | Analyzed | Analyzed |
| EC_04                        |                                          | 46          | F            | <25                        | 1,557                 | 5.6      | N.A                                                            | Analyzed | Analyzed |
| EC_05                        |                                          | 43          | F            | <25                        | 372                   | 4.3      | N.A                                                            | Analyzed | Analyzed |
| EC_06                        |                                          | 59          | M            | <25                        | 411                   | 11.1     | N.A                                                            | Analyzed | Analyzed |
| EC_07                        |                                          | 40          | F            | <25                        | 245                   | 180.2    | N.A                                                            | Analyzed | Analyzed |
| EC_09                        |                                          | 40          | F            | 56                         | 898                   | 3.8      | N.A                                                            | Analyzed | Analyzed |
| EC_10                        | 50                                       | M           | <25          | 450                        | 0                     | N.A      | Analyzed                                                       | Analyzed |          |
| EC_12                        | 46                                       | M           | <25          | 940                        | 3.4                   | N.A      | Analyzed                                                       | Analyzed |          |
| EC_13                        | 52                                       | M           | <25          | 667                        | 0                     | N.A      | Analyzed                                                       | Analyzed |          |
| EC_15                        | 53                                       | M           | <25          | 959                        | 20.8                  | N.A      | Analyzed                                                       | Analyzed |          |
| EC_18                        | 55                                       | F           | <50          | 838                        | 23.8                  | N.A      | Analyzed                                                       | Analyzed |          |

ND: Not determined  
M: Male  
F: Female
